# Supplementary material for: Validation of Gene Expression-Based Predictive Biomarkers for Response to Neoadjuvant Chemoradiotherapy in Locally Advanced Rectal Cancer
Source: MDPI journal article supplement (doi:10.3390/cancers13184642), 2021-09-16
Supplement: s1 [file s1]

Supplementary Figure S1

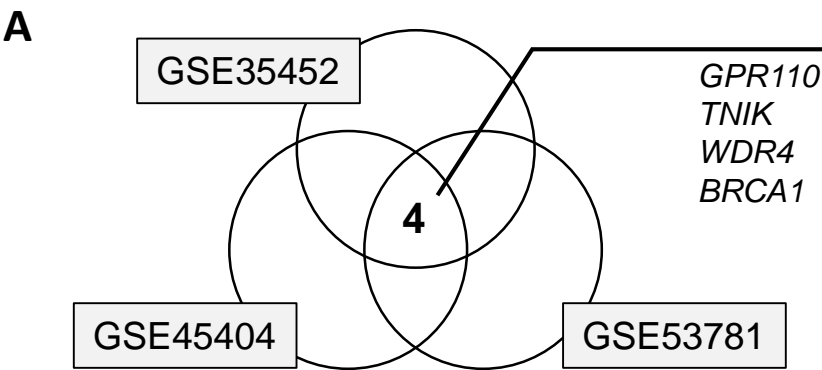

**B**

| Gene Symbol | GSE35452             |                  |                  |       | GSE45404             |                  |                  |       | GSE53781             |                  |                  |       |
|-------------|----------------------|------------------|------------------|-------|----------------------|------------------|------------------|-------|----------------------|------------------|------------------|-------|
|             | Non-Responder (n=22) | Responder (n=24) | Log2 fold-change | P     | Non-Responder (n=23) | Responder (n=19) | Log2 fold-change | P     | Non-Responder (n=35) | Responder (n=11) | Log2 fold-change | P     |
| GPR110      | 0.14                 | -1.06            | 1.21             | 0.048 | 3.25                 | 2.81             | 0.44             | 0.011 | 0.45                 | -1.02            | 1.47             | 0.009 |
| TNIK        | 0.21                 | -0.45            | 0.66             | 0.005 | 4.83                 | 4.13             | 0.70             | 0.024 | 0.44                 | -0.29            | 0.73             | 0.019 |
| WDR4        | -0.22                | 0.32             | -0.54            | 0.033 | 5.39                 | 5.87             | -0.48            | 0.031 | 1.39                 | 2.41             | -1.02            | 0.020 |
| BRCA1       | -0.08                | 0.19             | -0.27            | 0.037 | 5.31                 | 5.67             | -0.37            | 0.006 | 1.33                 | 2.55             | -1.22            | 0.024 |

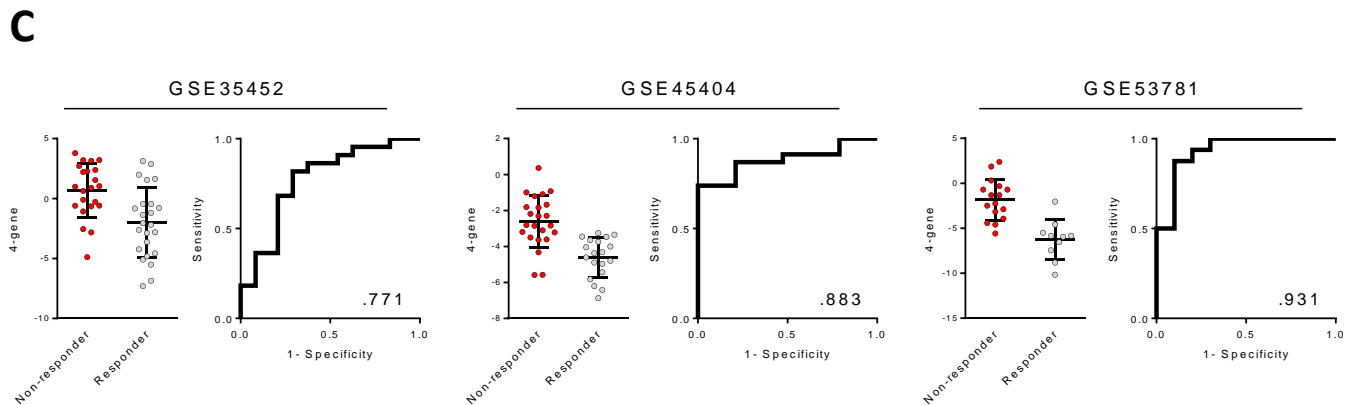

Supplementary Figure S1. Identification of 4 common genes that were significantly differentially expressed between biopsy specimens from non-responders and responders in three discovery cohorts, including GSE35452, GSE45404 and GSE53781. (A,B) The expression of GPR110 and TNIK was increased, but WDR4 and BRCA1 expression was decreased in non-responders compared to responders. (C) The levels of the 4-gene signature based on GPR110, TNIK, WDR4 and BRCA1 were higher in non-responders with AUCs ranging between 0.77 and 0.93 in each of the discovery cohort.

## Supplementary Figure S2

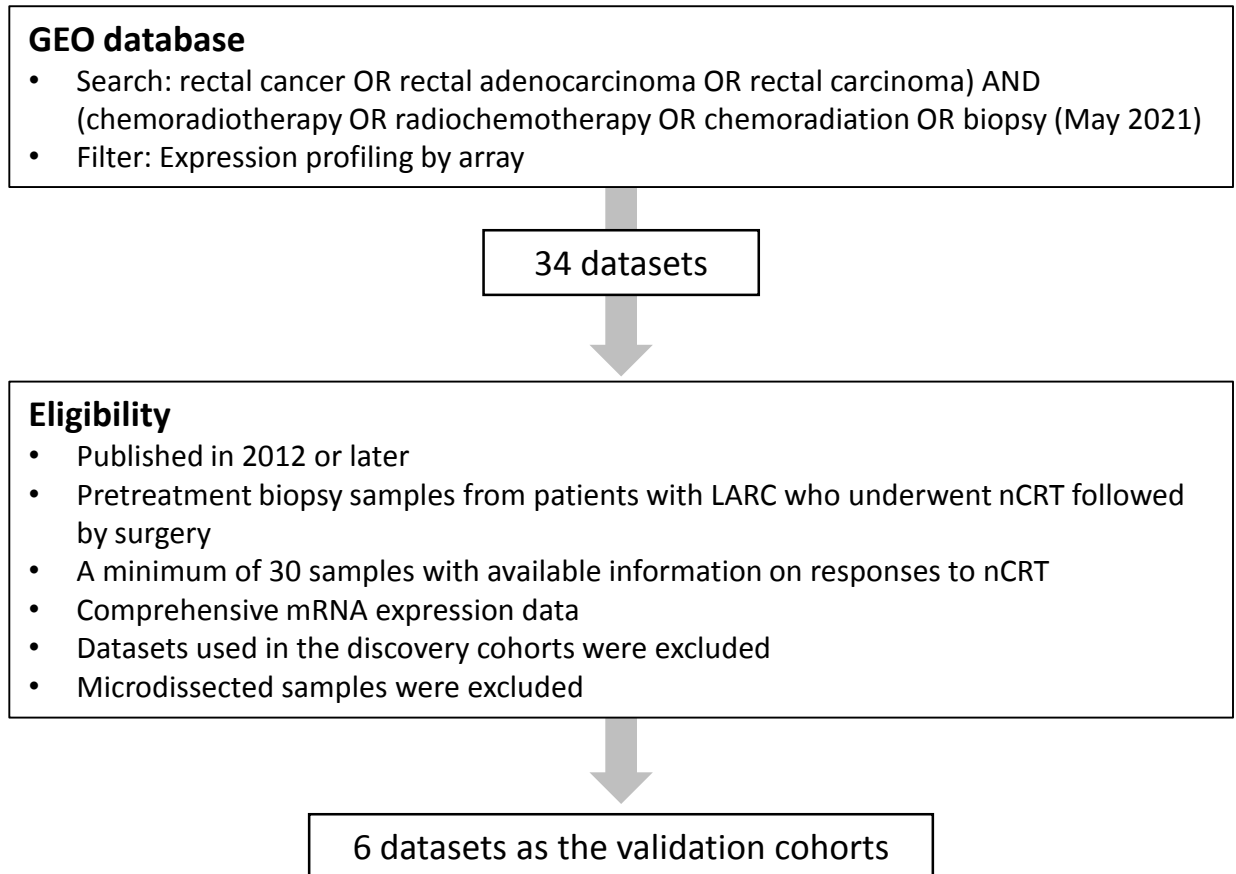

Supplementary Figure S2. Dataset selection flowchart for the validation cohorts. 34 datasets identified by GEO search were evaluated. Six datasets were selected to be included in the discovery cohorts.

Supplementary Figure S3

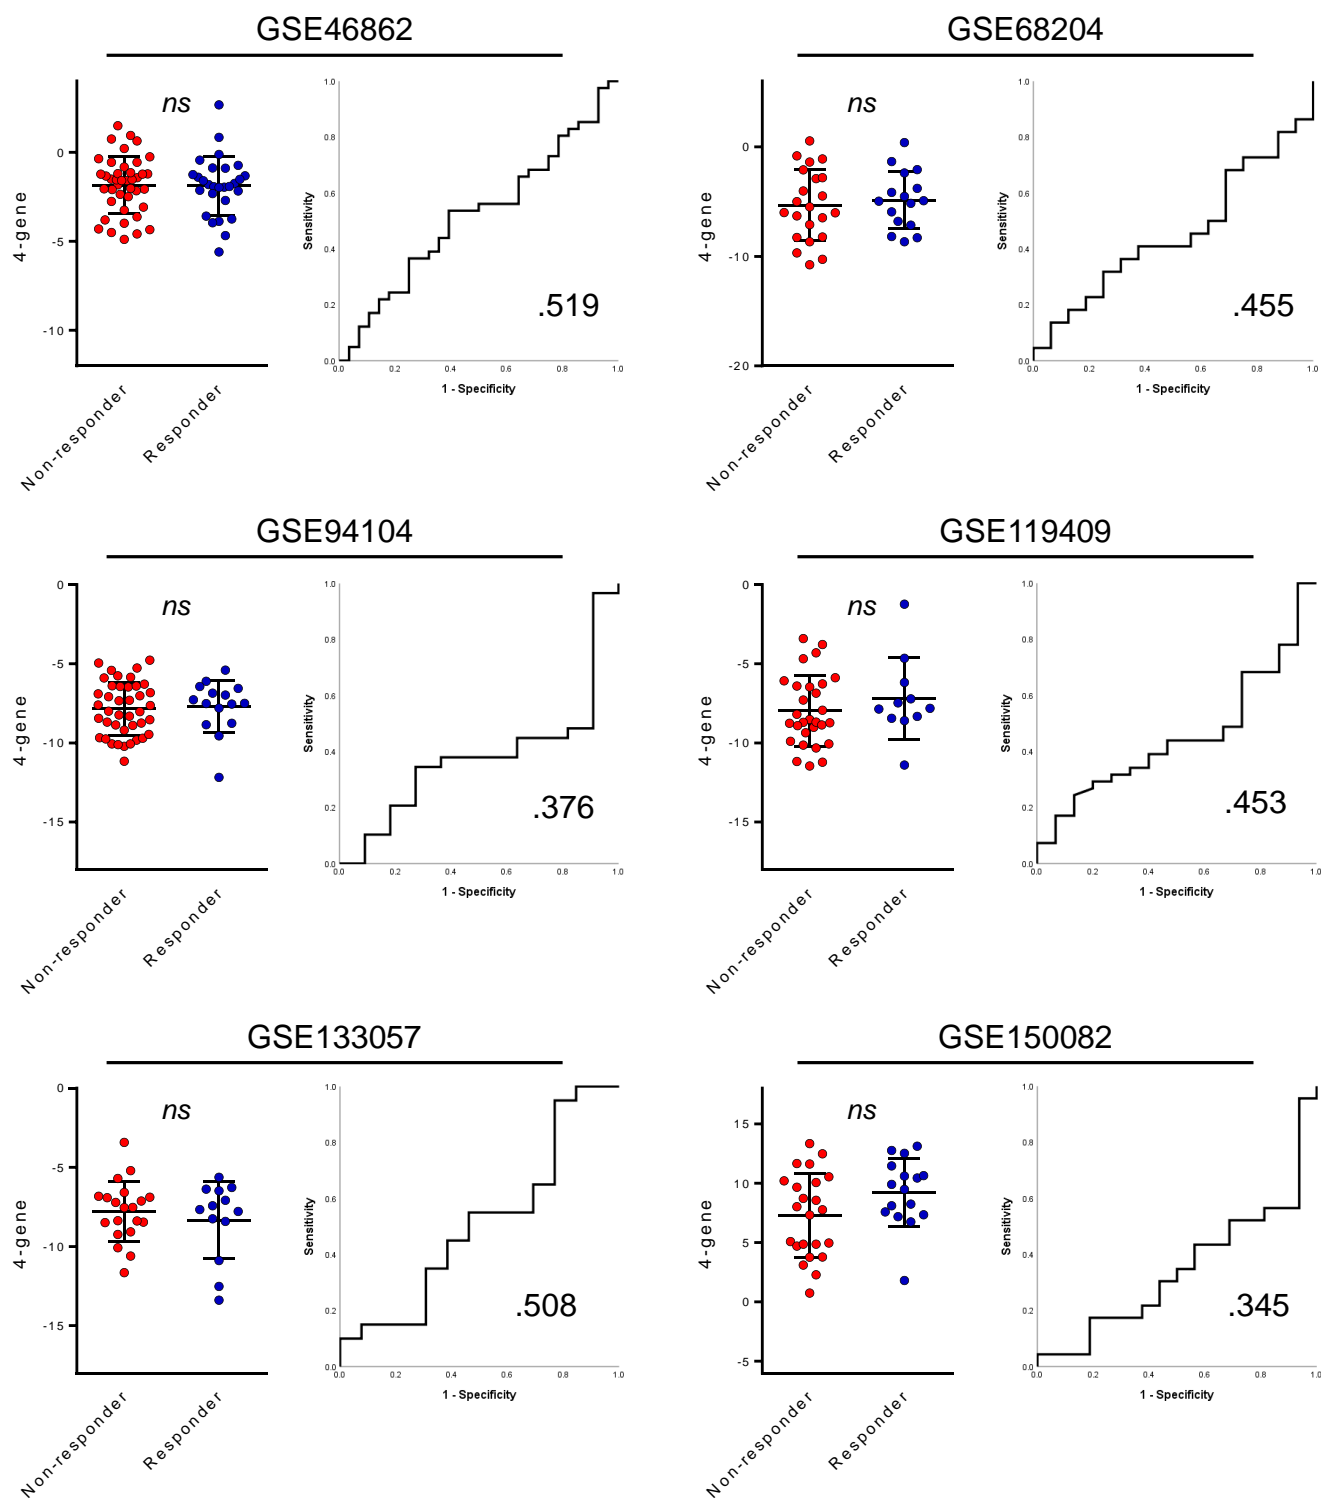

Supplementary Figure S3. The performance of the 4-gene signature in six validation datasets.

# Supplementary Figure S4

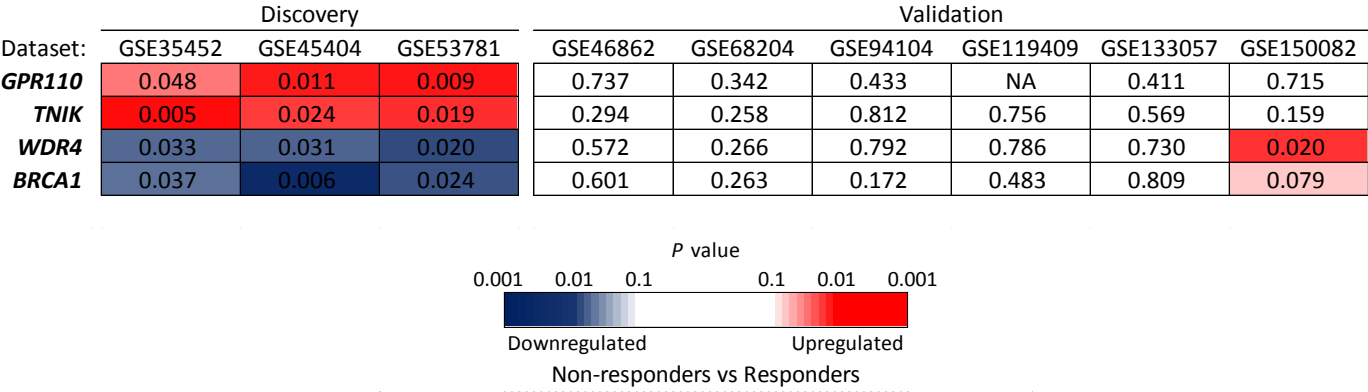

Supplementary Figure S4. Differential expression analyses of four single genes in the 4-gene signature between non-responders and responders in nine cohorts. *P* values are indicated for each analysis, and the red or blue colors represent upregulation or downregulation of genes in non-responders.

# Supplementary Figure S5

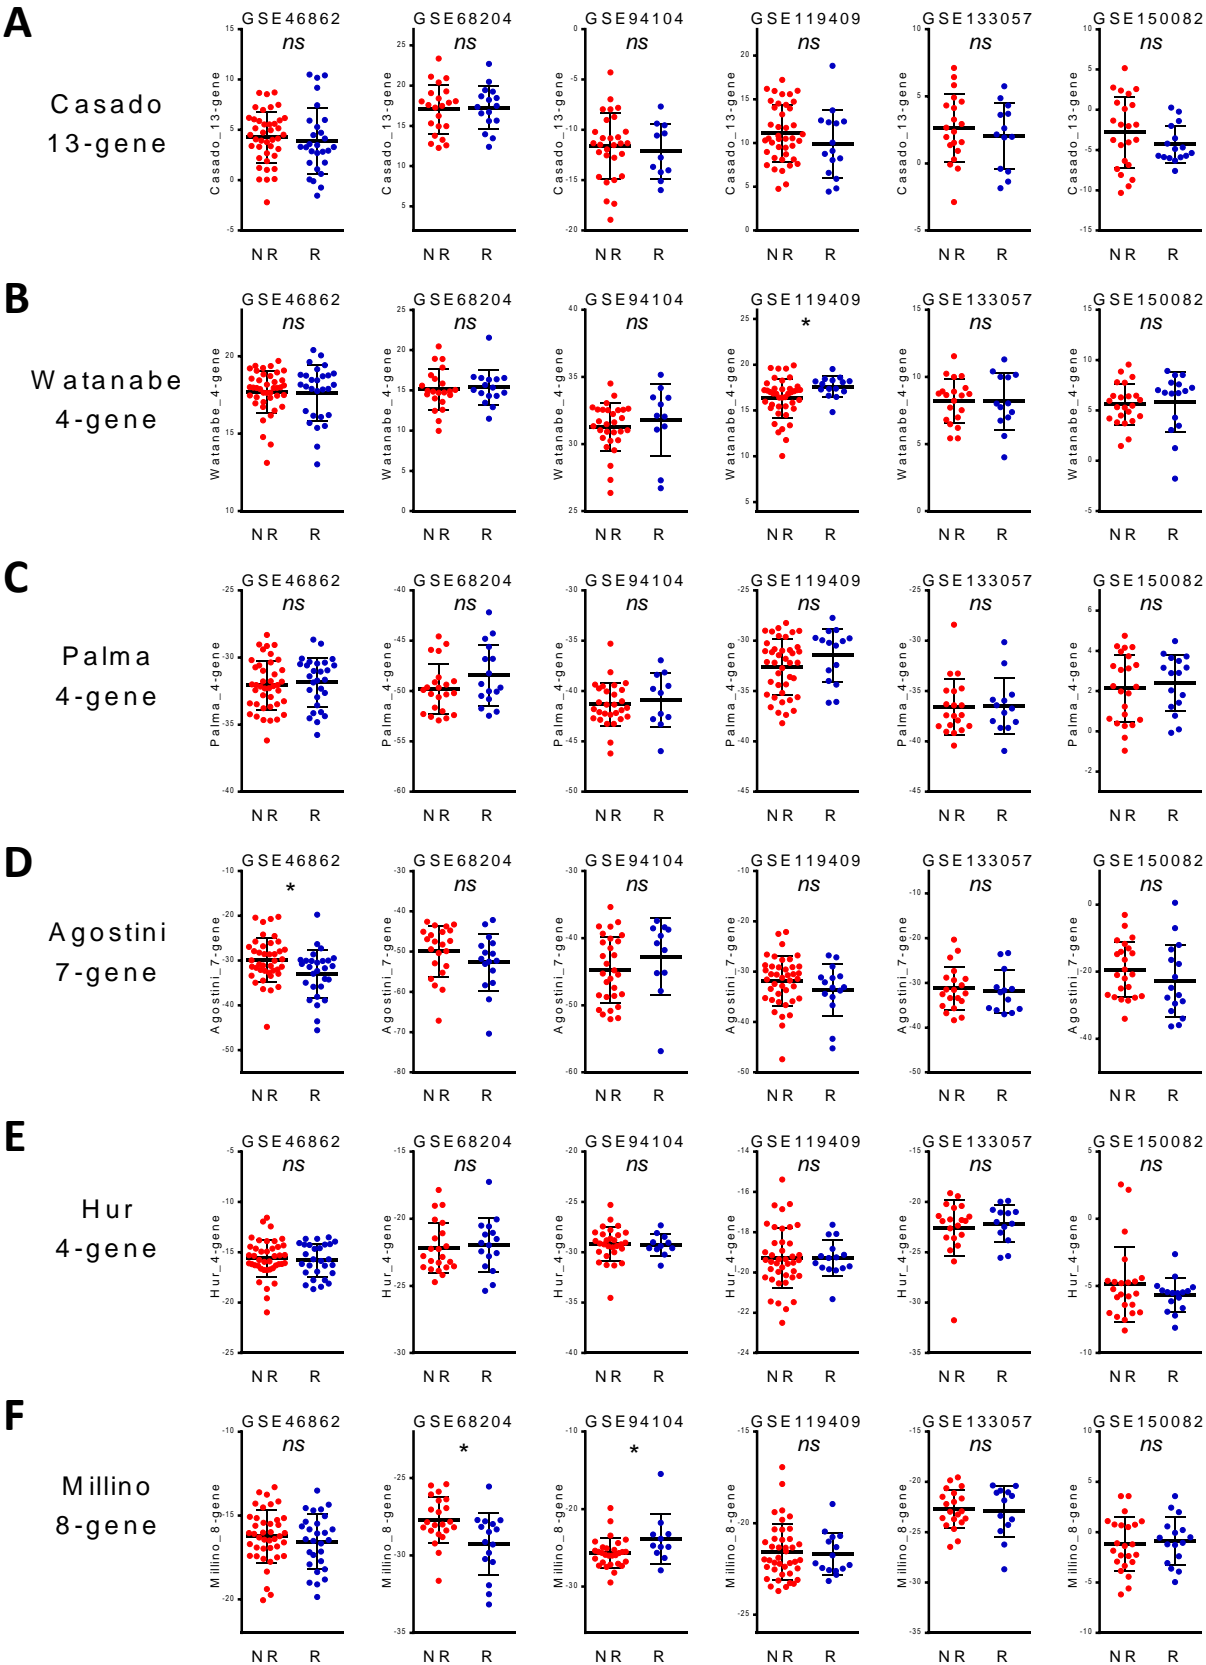

Supplementary Figure S5. The levels of six multi-gene signatures in non-responders (NR) and responders (R) in six validation cohorts.

# Supplementary Figure S6

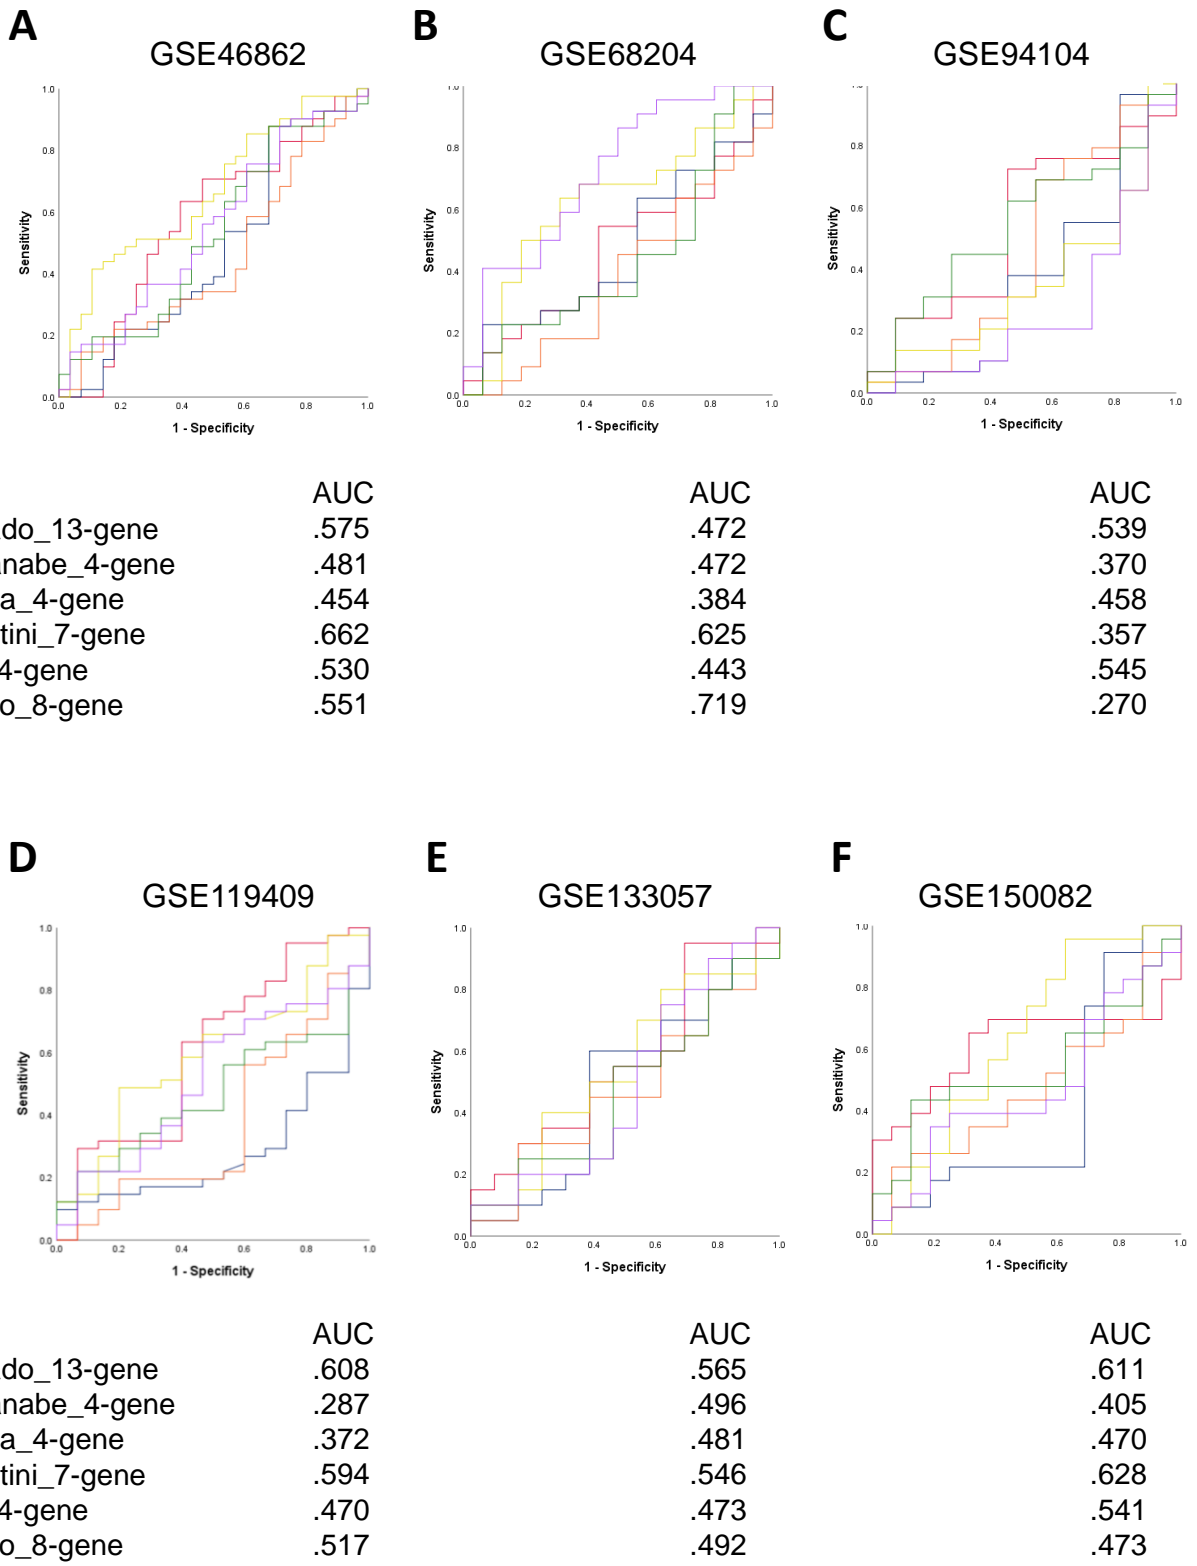

Supplementary Figure S6. The performance of the multi-gene signatures in six validation cohorts.

Supplementary Figure S7

A

CD44

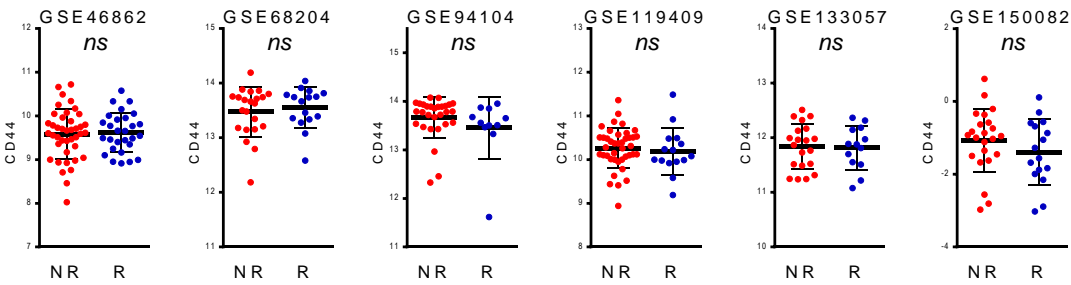

B

XRCC3

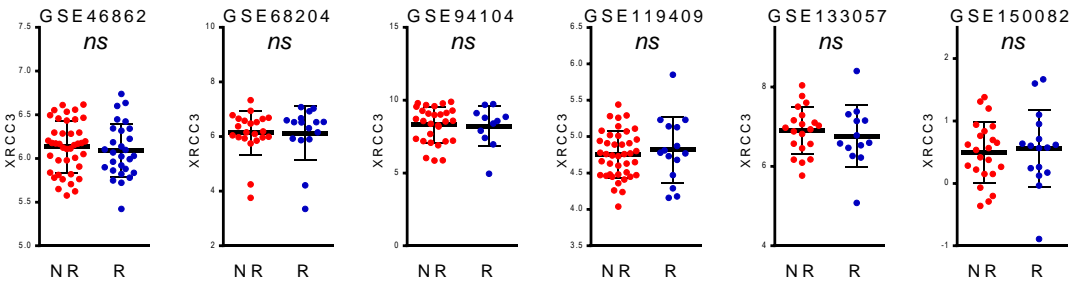

C

COASY

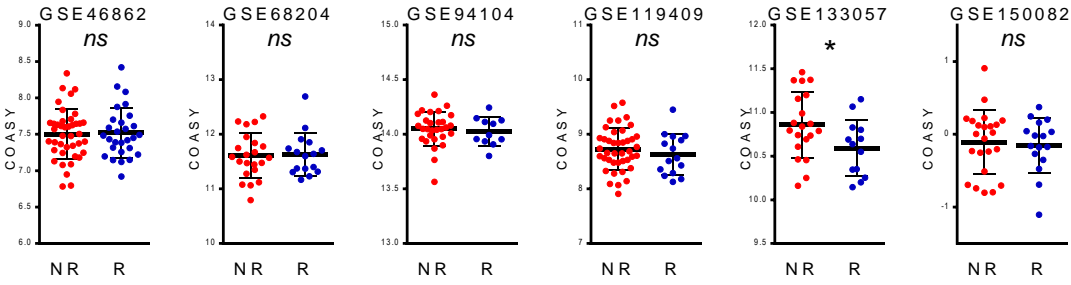

Supplementary Figure S7. The levels of six multi-gene signatures in non-responders (NR) and responders (R) in six validation cohorts.

Supplementary Figure S8

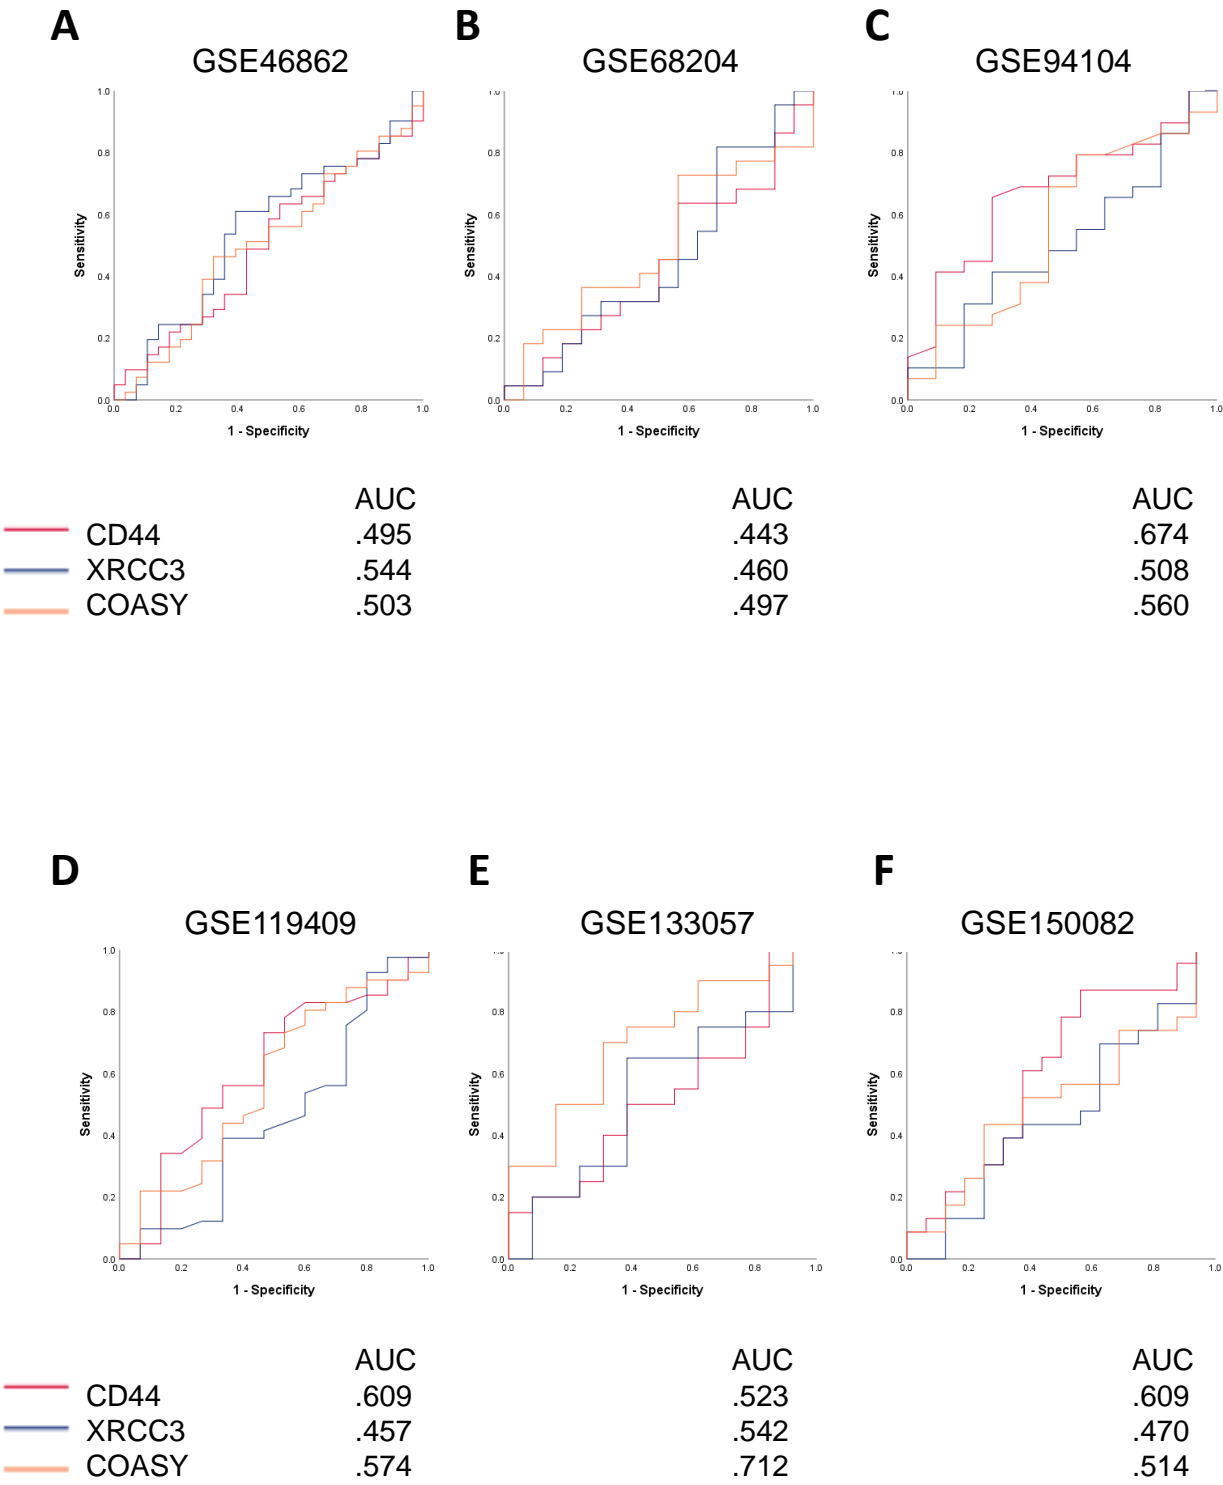

Supplementary Figure S8. The performance of three single-gene signatures in six validation cohorts.



**Supplementary Table S1. Characteristics of GEO datasets.**

| GEO accession | sample type                 | nCRT regimen                                                        | Age (Mean ± SD) | Sex                  | Non-responders according to sample characteristics reported in each GEO dataset | Responders according to sample characteristics reported in each GEO dataset | Tumor regression grading (TRG) system                                                    |
|---------------|-----------------------------|---------------------------------------------------------------------|-----------------|----------------------|---------------------------------------------------------------------------------|-----------------------------------------------------------------------------|------------------------------------------------------------------------------------------|
| GSE35452      | pre-treatment biopsy/frozen | UFT/LV with RT 50.4Gy                                               | N/A             | N/A                  | "Non-responder" =grade0-1                                                       | "Responder" =grade2-3                                                       | The Japanese Society for Cancer of the Colon and Rectum (grade 0-3)                      |
| GSE45404      | pre-treatment biopsy/frozen | 5FU iv with RT >50Gy                                                | 59.9 ± 11.1     | 24 male<br>18 female | "Non-responder" =TRG 3-5                                                        | "Responder" =TRG 1-2                                                        | Mandard (TRG 1-5)                                                                        |
| GSE53781      | pre-treatment biopsy/frozen | Cape ± L-OHP with RT 50.4Gy                                         | 60.6 ± 11.7     | 7 male<br>18 female  | "Non-responder" =TRG 3-5                                                        | "Responder" =TRG 1-2                                                        | Mandard (TRG 1-5)                                                                        |
| GSE46862      | pre-treatment biopsy/frozen | N/A                                                                 | 55.7 ± 10.8     | 49 male<br>20 female | grade 0-2                                                                       | grade 3-4                                                                   | Dworak (grade 0-4)                                                                       |
| GSE68204      | pre-treatment biopsy/frozen | 5FU iv or Cape ± L-OHP with RT >45Gy                                | 64.5 ± 8.4      | 25 male<br>13 female | "Non-responder" =TRG 3-5                                                        | "Responder" =TRG 1-2                                                        | Mandard (TRG 1-5)                                                                        |
| GSE94104      | pre-treatment biopsy/FFPE   | 5FU iv or Cape with RT 45Gy                                         | N/A             | N/A                  | TRG 1-2                                                                         | TRG 3                                                                       | Four-tier tumor regression grade system (TRG 0-3)                                        |
| GSE119409     | pre-treatment biopsy/frozen | Cape with RT 50.6Gy                                                 | 56.8 ± 11.1     | N/A                  | "Resistant"                                                                     | "Sensitive"                                                                 | Four-tier tumor regression grade system (TRG 0-3)                                        |
| GSE133057     | pre-treatment biopsy/frozen | 5FU iv with RT 50.4Gy                                               | 56.8 ± 10.4     | 23 male<br>10 female | AJCC score 2-3                                                                  | AJCC score 0-1                                                              | The AJCC criteria (AJCC 0-3)                                                             |
| GSE150082     | pre-treatment biopsy/frozen | Cape with RT 50.4Gy or Cape + L-OHP followed by Cape with RT 50.4Gy | 58.8 ± 11.0     | 29 male<br>10 female | "Poor response" =TRG 2-3                                                        | "Good response" =TRG 0-1                                                    | American Joint Committee on Cancer and College of American Pathologists regression grade |
